# Supplementary material for: Atmospheric conditions favouring extreme precipitation and flash floods in temperate regions of Europe
Source: Copernicus journal article supplement (doi:10.5194/hess-26-6163-2022), 2022-12-09
Supplement: Supplementary file 1 [file hess-26-6163-2022-supplement.zip]

Archive with 4 entries (4 files):
- hess-26-6163-2022-supplement-title-page.pdf
- S2_pressure-levels.pdf
- S3_threshold-sensitivity.pdf
- S1_flash-flood-data-base.pdf
