# Supplementary material for: Atmospheric conditions favouring extreme precipitation and flash floods in temperate regions of Europe
Source: Copernicus journal article supplement (doi:10.5194/hess-26-6163-2022), 2022-12-09
Supplement: Supplementary file 1 [file hess-26-6163-2022-supplement.zip › hess-26-6163-2022-supplement-title-page.pdf]

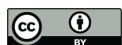

*Supplement of*

**Atmospheric conditions favouring extreme precipitation and flash floods  
in temperate regions of Europe**

**Judith Meyer et al.**

*Correspondence to:* Judith Meyer ([judith.meyer@list.lu](mailto:judith.meyer@list.lu))

- [hess-26-6163-2022-supplement-title-page.pdf](#)
- [S1\\_flash-flood-data-base.pdf](#)
- [S2\\_pressure-levels.pdf](#)
- [S3\\_threshold-sensitivity.pdf](#)

The copyright of individual parts of the supplement might differ from the article licence.
