# Supplementary material for: Atmospheric conditions favouring extreme precipitation and flash floods in temperate regions of Europe
Source: Copernicus journal article supplement (doi:10.5194/hess-26-6163-2022), 2022-12-09
Supplement: Supplementary file 1 [file hess-26-6163-2022-supplement.zip › S1_flash-flood-data-base.pdf]

# Supplement S1: Flash flood data base

Flash flood database used in this manuscript. Region abbreviations are in Germany Baden-Württemberg (Ba-Wü), Rhineland-Palatine (RLP), in France Ardennes (Ar), Lorraine (Lo), Alsace (Al), Haute Marne (H-Ma), Marne (Ma), in Eastern Belgium (BE) and in Luxembourg (LUX).

|    | Date       | Location (stream)          | Region | Source                     |
|----|------------|----------------------------|--------|----------------------------|
| 1  | 26/07/2019 | Müllheim                   | Ba-Wü  | Wald + Corbe, 2021         |
| 2  | 26/07/2019 | Hechingen                  | Ba-Wü  | Wald + Corbe, 2021         |
| 3  | 27/07/2019 | Pforzheim-Ispringen        | Ba-Wü  | Wald + Corbe, 2021         |
| 4  | 27/07/2019 | Königsbach-Stein           | Ba-Wü  | Wald + Corbe, 2021         |
| 5  | 27/07/2019 | Gernsbach                  | Ba-Wü  | Wald + Corbe, 2021         |
| 6  | 27/07/2019 | Tuttlingen                 | Ba-Wü  | Wald + Corbe, 2021         |
| 7  | 18/06/2019 | Ellmendingen (Pfinz)       | Ba-Wü  | Wald + Corbe, 2021         |
| 8  | 01/06/2018 | Müllerthal (Black Ernzt)   | LUX    | Pfister et al., 2020       |
| 9  | 01/06/2018 | Larochette (White Ernzt)   | LUX    | Pfister et al., 2020       |
| 10 | 01/06/2018 | Hallerbach                 | LUX    | Pfister et al., 2020       |
| 11 | 01/06/2018 | Echtershausen (Prüm)       | RLP    | Johst et al., 2018         |
| 12 | 01/06/2018 | Gemünd (Irsen)             | RLP    | Johst et al., 2018         |
| 13 | 01/06/2018 | Bierbach (Lünebach)        | RLP    | Johst et al., 2018         |
| 14 | 31/05/2018 | Ehingen (Würm)             | Ba-Wü  | Wald + Corbe, 2021         |
| 15 | 27/05/2018 | Gerach (Fischbach)         | RLP    | Johst et al., 2018         |
| 16 | 22/05/2018 | Odenheim                   | Ba-Wü  | Wald + Corbe, 2021         |
| 17 | 22/05/2018 | Helmsheim/Heidelsheim      | Ba-Wü  | Wald + Corbe, 2021         |
| 18 | 22/05/2018 | Gondelsheim                | Ba-Wü  | Wald + Corbe, 2021         |
| 19 | 22/07/2016 | Hallerbach                 | LUX    | Pfister et al., 2018       |
| 20 | 22/07/2016 | Larochette (White Ernzt)   | LUX    | Pfister et al., 2018       |
| 21 | 21/07/2016 | Audun-le-Tiche             | Lo     | France 3 - Grand Est, 2016 |
| 22 | 07/06/2016 | Stein                      | Ba-Wü  | Göppert, 2018              |
| 23 | 07/06/2016 | Waldkirch (Elz)            | Ba-Wü  | Göppert, 2018              |
| 24 | 29/05/2016 | Braunsbach (Orlacher Bach) | Ba-Wü  | Bronstert et al., 2018     |
| 25 | 29/05/2016 | Dallau                     | Ba-Wü  | Göppert, 2018              |
| 26 | 28/05/2016 | Waldbrunn                  | Ba-Wü  | Göppert, 2018              |
| 27 | 24/07/2015 | Hausen am Tann             | Ba-Wü  | Wald + Corbe, 2021         |
| 28 | 14/06/2015 | Bonndorf                   | Ba-Wü  | Wald + Corbe, 2021         |
| 29 | 06/06/2015 | Bretten                    | Ba-Wü  | Göppert, 2018              |
| 30 | 11/07/2014 | Saint-Avold (La Roselle)   | Lo     | France 3 - Grand Est, 2014 |
| 31 | 12/07/2010 | Munzingen                  | Ba-Wü  | Göppert, 2018              |
| 32 | 04/07/2010 | Ditzingen (Glems)          | Ba-Wü  | Göppert, 2018              |

|    |            |                                 |       |                              |
|----|------------|---------------------------------|-------|------------------------------|
| 33 | 03/07/2009 | Ditzingen (Glems)               | Ba-Wü | Wald + Corbe, 2021           |
| 34 | 08/06/2008 | Britzingen (Ehebach)            | Ba-Wü | Göppert, 2018                |
| 35 | 02/06/2008 | Rangendingen (Starzel River)    | Ba-Wü | Ruiz-Villanueva et al., 2012 |
| 36 | 02/06/2008 | Jungingen                       | Ba-Wü | Ruiz-Villanueva et al., 2012 |
| 37 | 30/05/2008 | Oberboihingen (Heuspachklingen) | Ba-Wü | Wald + Corbe, 2021           |
| 38 | 09/06/2007 | Reichenbach (Fils)              | Ba-Wü | Göppert, 2018                |
| 39 | 22/07/2006 | Mölschbach (Rambach)            | Ba-Wü | Wald + Corbe, 2021           |
| 40 | 05/07/2006 | Stebbach (Stebbach)             | Ba-Wü | Göppert, 2018                |

---

## 5 Bibliography

- Bronstert, A., Agarwal, A., Boessenkool, B., Crisologo, I., Fischer, M., Heistermann, M., Köhn-Reich, L., López-Tarazón, J. A., Moran, T., Ozturk, U., Reinhardt-Imjela, C. and Wendi, D.: Forensic hydro-meteorological analysis of an extreme flash flood: The 2016-05-29 event in Braunsbach, SW Germany, *Sci. Total Environ.*, 630, 977–991, doi:<https://doi.org/10.1016/j.scitotenv.2018.02.241>, 2018.
- 10 Caisse Centrale de Réassurance (CCR): Orages en Meurthe-et-Moselle en mai 2012. [online] Available from: [https://catastrophes-naturelles.ccr.fr/-/001872\\_orages-en-meurthe-et-moselle-en-mai-2012](https://catastrophes-naturelles.ccr.fr/-/001872_orages-en-meurthe-et-moselle-en-mai-2012), 2020.
- Van Campenhout, J., Hallot, E., Houbrechts, G., Peeters, A., Levecq, Y., Gérard, P. and Petit, F.: Flash floods and muddy floods in Wallonia: Recent temporal trends, spatial distribution and reconstruction of the hydrosedimentological fluxes using flood marks and sediment deposits, *Belgeo*, 1, 0–26, doi:10.4000/belgeo.16409, 2015.
- 15 France 3 - Grand Est: Saint-Avold : près de 600 interventions après un violent orage, , 12th July [online] Available from: <https://france3-regions.francetvinfo.fr/grand-est/2014/07/12/saint-avold-pres-de-600-interventions-apres-un-violent-orage-516161.html>, 2014.
- France 3 - Grand Est: Briey (54) inondée, [online] Available from: <https://france3-regions.francetvinfo.fr/grand-est/meurthe-et-moselle/briey-54-inondee-1010579.html>, 2016a.
- 20 France 3 - Grand Est: C'est l'heure du nettoyage à Avenay-Val-d'Or (Marne) après les orages de ce mardi, , 7th June [online] Available from: <https://france3-regions.francetvinfo.fr/grand-est/marne/c-est-l-heure-du-nettoyage-avenay-val-d-or-marne-apres-les-orages-de-ce-mardi-1017887.html>, 2016b.
- France 3 - Grand Est: Des orages et inondations ont touché la Moselle et le Luxembourg, , 22nd July [online] Available from: <https://france3-regions.francetvinfo.fr/grand-est/moselle/des-orages-et-inondations-ont-touche-la-moselle-et-le-luxembourg-1053137.html>, 2016c.
- 25 France 3 - Grand Est: Inondations dans le secteur de Niederbronn-les-Bains, , 17th June [online] Available from: <https://france3-regions.francetvinfo.fr/grand-est/bas-rhin/inondations-dans-le-secteur-de-niederbronn-les-bains-1026191.html>, 2016d.
- France 3 - Grand Est: Inondations du côté de Lunéville : le village de Valhey frappé en 10 minutes, , 4th June [online] Available

- 30 from: <https://france3-regions.francetvinfo.fr/grand-est/meurthe-et-moselle/inondations-du-cote-de-luneville-le-village-de-valhey-frappe-en-10-minutes-1015321.html>, 2016e.
- France 3 - Grand Est: Intempéries à Berstett : “on se retrouve avec un tsunami dans la pépinière,” , 30th May [online] Available from: <https://france3-regions.francetvinfo.fr/grand-est/bas-rhin/intemperies-berstett-se-retrouve-avec-un-tsunami-dans-la-pepiniere-1009773.html>, 2016f.
- 35 France 3 - Grand Est: Les images des inondations impressionnantes à Margut et Sapogne-sur-Marche (Ardennes) tournées par des habitants, , 5th June [online] Available from: <https://france3-regions.francetvinfo.fr/grand-est/l-histoire-du-pont-emporte-par-les-eaux-de-sapogne-sur-marche-1015627.html>, <https://france3-regions.francetvinfo.fr/grand-est/ardennes/les-images-des-inondations-impressionnantes-margut-et-sapogne-sur-marc>, 2016g.
- France 3 - Grand Est: Silvange (57) un lotissement prend l’eau en quelques minutes, , 8th June [online] Available from: <https://france3-regions.francetvinfo.fr/grand-est/moselle/silvange-57-un-lotissement-prend-l-eau-en-quelques-minutes-1017969.html>, 2016h.
- 40 France 3 - Grand Est: Alsace: Importantes inondations et coulées de boues à Geudertheim dans le Bas-Rhin, , 13th May [online] Available from: <https://france3-regions.francetvinfo.fr/grand-est/alsace-importantes-coulees-boues-geudertheim-bas-rhin-1474401.html>, 2018a.
- 45 France 3 - Grand Est: Importantes inondations à Cirfontaines-en-Azois et Orges en Haute-Marne, , 5th June [online] Available from: <https://france3-regions.francetvinfo.fr/grand-est/importantes-inondations-cirfontaines-azois-orges-haute-marne-1488611.html>, 2018b.
- France 3 - Grand Est: Inondations et coulées de boue : de gros dégâts à Hattstatt et Voegtlinshoffen, , 13th June [online] Available from: <https://france3-regions.francetvinfo.fr/grand-est/inondations-secteurs-colmar-oltingue-molsheim-obernai-touchees-1493627.html>, 2018c.
- 50 France 3 - Grand Est: Intempéries : importants dégâts à Epinal, , 29th May [online] Available from: <https://france3-regions.francetvinfo.fr/grand-est/vosges/epinal/intemperies-importants-degats-epinal-1484295.html>, 2018d.
- France 3 - Grand Est: Orages : le plateau de Langres particulièrement touché par les inondations, , 6th June [online] Available from: <https://france3-regions.francetvinfo.fr/grand-est/orages-plateau-langres-particulierement-touche-inondations-1489387.html>, 2018e.
- 55 France 3 - Grand Est: Orages : Lenoncourt sous les eaux, , 1st June [online] Available from: <https://france3-regions.francetvinfo.fr/grand-est/meurthe-et-moselle/nancy/orages-lenoncourt-eaux-1486391.html>, 2018f.
- France 3 - Grand Est: Violents orages en Alsace : jusqu’à 1,70 m d’eau à Gougenheim, une des communes les plus touchées, , 1st June [online] Available from: <https://france3-regions.francetvinfo.fr/grand-est/violents-orages-alsace-170-m-eau-gougenheim-communes-plus-touchees-1486085.html>, 2018g.
- 60 Göppert, H.: Auswertung von abgelaufenen Starkregenereignissen über Radarmessungen, *Wasserwirtschaft*, 108(11), 44–50, doi:10.1007/s35147-018-0223-8, 2018.
- Johst, M.: Hochwasserfrühwarnung für kleine Einzugsgebiete, in *Veranstaltung zu Starkregen und Hochwasserschutz im*

Ministerium für Umwelt, Energie, Ernährung und Forsten. [online] Available from:  
65 [https://lfu.rlp.de/fileadmin/lfu/Downloads/Fachveranstaltung\\_Starkregen/Top4\\_Fruehwarnung\\_Johst\\_LfU.pdf](https://lfu.rlp.de/fileadmin/lfu/Downloads/Fachveranstaltung_Starkregen/Top4_Fruehwarnung_Johst_LfU.pdf), 2018.

Johst, M., Gerlach, N. and Demuth, N.: Starkregen und Hochwasser im Mai/Juni 2018, Mainz, Germany. [online] Available  
from: [http://www.hochwasser-rlp.de/publikationen/bericht\\_juni\\_2018.pdf](http://www.hochwasser-rlp.de/publikationen/bericht_juni_2018.pdf), 2018.

Ministère de l'Écologie, du Développement durable, des T. et du L.: L'évaluation préliminaire des risques d'inondation 2011.  
[online] Available from: <http://www.grand-est.developpement->  
70 [durable.gouv.fr/IMG/pdf/epri\\_rhin\\_maquettage\\_final2\\_cle2fc92b.pdf](http://www.grand-est.developpement-durable.gouv.fr/IMG/pdf/epri_rhin_maquettage_final2_cle2fc92b.pdf), 2011.

News Trier (Blaes): Sturzflut in Niederweiler im Hunsrück, knapp 100 Kräfte im Einsatz, [online] Available from:  
<https://news-trier.de/sturzflut-in-niederweiler-im-hunsrueck-knapp-100-kraefte-im-einsatz/>, 2020.

Pfister, L., Faber, O., Hostache, R., Iffly, J. F., Matgen, P., Minette, F., Trebs, I., Bastian, C., Göhlhausen, D., Meisch, C. and  
Patz, N.: Crue éclair du 22 juillet 2016 dans la region de Larochette - Étude mécanistique et fréquentielle réalisée en 2018  
75 pour le compte de l'Administration de la gestion de l'eau, Esch-sur-Alzette. [online] Available from:  
<https://eau.gouvernement.lu/dam-assets/publications/crue-éclair-du-22-juillet-2016/1812-LIST-BrochureCrueEclair.pdf>,  
2018.

Pfister, L., Douinot, A., Hostache, R., François, I. J., Matgen, P., Minette, F., Bastian, C., Gilbertz, C., Göhlhausen, D., Meisch,  
C. and Patz, N.: Crues subites 2018 - Étude mécanistique et fréquentielle des crues subites de 2018 au Luxembourg, Esch-  
80 sur-Alzette. [online] Available from: [https://eau.gouvernement.lu/fr/services-aux-](https://eau.gouvernement.lu/fr/services-aux-citoyens/publications/2021/brochures/Crues-subites-2018.html)  
[citoyens/publications/2021/brochures/Crues-subites-2018.html](https://eau.gouvernement.lu/fr/services-aux-citoyens/publications/2021/brochures/Crues-subites-2018.html), 2020.

Ruiz-Villanueva, V., Borga, M., Zoccatelli, D., Marchi, L., Gaume, E. and Ehret, U.: Extreme flood response to short-duration  
convective rainfall in South-West Germany, Hydrol. Earth Syst. Sci., 16(5), 1543–1559, doi:10.5194/hess-16-1543-2012,  
2012.

85 Wald + Corbe: Personal communication (Göppert, Hans; Schäfer, Catharin), , [c.schaefer@wald-corbe.de](mailto:c.schaefer@wald-corbe.de); [h.goeppert@wald-](mailto:h.goeppert@wald-corbe.de)  
[corbe.de](mailto:h.goeppert@wald-corbe.de), 2021.
